# Supplementary material for: Sustained effect of glucagon on body weight and blood glucose: Assessed by continuous glucose monitoring in diabetic rats
Source: PubMed Central journal article supplement (PMC5860770; doi:10.1371/journal.pone.0194468), 2018-03-20
Supplement: pone.0194468.s001.pdf [file pone.0194468.s001.pdf]

| <b>Binding affinity of native glucagon and the LAG on the rGCGR and hGLP-1R</b> |                                     |                                       |
|---------------------------------------------------------------------------------|-------------------------------------|---------------------------------------|
|                                                                                 | rGCGR<br>pLogIC <sub>50</sub> ± SEM | hGLP-1R<br>pLogIC <sub>50</sub> ± SEM |
| Native glucagon                                                                 | 9.4 ± 0.3 (n = 13)                  | < 6.0                                 |
| LAG                                                                             | 9.6 ± 0.4 (n = 5)                   | Not tested                            |

| <b>Potency of native glucagon and the LAG in rat hepatocytes</b> |                                     |
|------------------------------------------------------------------|-------------------------------------|
|                                                                  | rGCGR<br>plogEC <sub>50</sub> ± SEM |
| Native glucagon                                                  | 8.7 ± 0.6 (n = 5)                   |
| LAG                                                              | 8.9 ± 0.2 (n = 5)                   |

### **S1 Tables: Binding affinity and potency of the LAG compared to native glucagon**

The binding affinity of native glucagon and the long-acting glucagon analog (LAG) to the rat glucagon receptor (rGCGR) and human GLP-1 receptor (hGLP-1R) was determined on membranes from BHK cells overexpressing the rGCGR and hGLP-1R, respectively (see details below). There was no significant difference between native glucagon and the LAG on the rGCGR ( $p = 0.7$ , analyzed using a two-tailed unpaired t-test). Data are expressed as means ± SEM.

The potency of the LAG and native glucagon was determined in primary rat hepatocytes, using the Adenylyl Cyclase Activation Flashplate<sup>®</sup> Assay (see details below). There was no significant difference between native glucagon and the LAG ( $p = 0.8$ , analyzed using a two-tailed unpaired t-test). Data are expressed as means ± SEM.

### **Methods**

Binding affinity was determined by the scintillation proximity assay (SPA). Solubilized membranes were prepared from BHK-cells overexpressing the rGCGR and hGLP-1R. 5 µg membranes, 0.5 mg SPA-beads, 60 pM <sup>125</sup>I-tracer (<sup>125</sup>I-glucagon or <sup>125</sup>I-GLP-1), and native glucagon or LAG in increasing concentrations (0-1 µM, diluted in buffer with 50 mM HEPES, 1mM CaCl<sub>2</sub>, 1mM MgCl<sub>2</sub>, 0.02% tween20, pH = 7.4) were added to each well of a 384-well plate (final volume 40 µl). The plate was incubated for 2 hours at 25°C. Then it was centrifuged at 1,500 RPM for 10 minutes before reading in a scintillation counter (Topcounter).

The Adenylyl Cyclase Activation Flashplate<sup>®</sup> Assay (PerkinElmer #SMP004A) is a scintillation based assay to detect intracellular levels of cAMP. Primary rat hepatocytes were centrifuged and re-suspended in stimulation buffer with IBMX (provided with the kit) ( $1 \times 10^6$  cells/mL). 50 µL cell suspension were added to the FlashPlate (50,000 cells/well) and stimulated with 50 µL ligands diluted in PBS with 0.02% Tween-20 and 20 mM glucose. After incubation for 30 min. detection buffer from the kit with radiolabelled cAMP was added and after incubation for 2-24 hours the FlashPlate was read in a Topcounter. The concentration of cAMP produced was interpolated from the standard curve (prepared according to the protocol from the kit).
