# Supplementary material for: Sustained effect of glucagon on body weight and blood glucose: Assessed by continuous glucose monitoring in diabetic rats
Source: PubMed Central journal article supplement (PMC5860770; doi:10.1371/journal.pone.0194468), 2018-03-20
Supplement: pone.0194468.s002.pdf [file pone.0194468.s002.pdf]

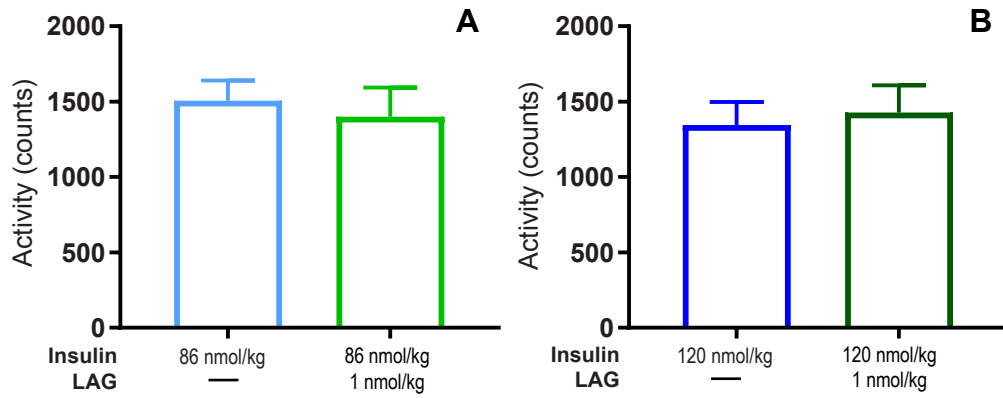

**S1 Fig: Glucagon effect on activity during dark period.**

Mean activity from 0-8 h. after dosing of 86 nmol/kg insulin  $\pm$  1 nmol/kg LAG (A) and 120 nmol/kg insulin  $\pm$  1 nmol/kg LAG (B) during the dark period. Data are expressed as means of 5 days (86 nmol/kg insulin) and 2 days (120 nmol/kg insulin), respectively  $\pm$  SEM; n = 4-8.
